# Supplementary material for: Projected impact of biosimilar substitution policies on drug use and costs in Ontario, Canada: a cross-sectional time series analysis
Source: PubMed Central journal article supplement — CMAJ Open. 2021 Nov 23;9(4):E1055–62. doi: 10.9778/cmajo.20210091 (PMC8612652; doi:10.9778/cmajo.20210091), 2021-11-23
Supplement: 2021-0091-1-at.pdf [file 2021-0091-1-at.pdf]

**eTable 1: Description of databases and specific data elements used in analysis**

| <b>Database</b>                              | <b>Description</b>                                                                                            | <b>Data Elements</b>                                                                                                             | <b>Quality</b>                                                                                                                                                                                                                                        |
|----------------------------------------------|---------------------------------------------------------------------------------------------------------------|----------------------------------------------------------------------------------------------------------------------------------|-------------------------------------------------------------------------------------------------------------------------------------------------------------------------------------------------------------------------------------------------------|
| <b>Ontario Drug Benefit (ODB) Database</b>   | Dispensing records for all prescription drugs reimbursed by the Ontario Drug Benefit (ODB) program in Ontario | DIN (drug identification number), dispensing date, total amount reimbursed by the ODB, deductible, dispensing fee, cost upcharge | A study of the reliability of this database estimates an error rate <1% <sup>1</sup>                                                                                                                                                                  |
| <b>Registered Persons Database</b>           | Demographic information related to anyone who has ever received an Ontario health card                        | Age, sex                                                                                                                         | Data is received directly from the Ministry of Health, and therefore is highly accurate                                                                                                                                                               |
| <b>IQVIA Solutions Drug Information File</b> | Information on drugs used in Canada since 1990                                                                | DIN, generic drug name, subclass name, Pharmacology Classification Group (PCG)                                                   | This data file is generated by combining data from IQVIA Solutions Canada Inc, and the ODB database (described above). IQVIA's file is created by contacting drug manufacturers and review of current and historic drug formularies from 1990 onwards |

## References

1. Levy AR, O'Brien BJ, Sellors C, Grootendorst P, Willison D. Coding accuracy of administrative drug claims in the Ontario Drug Benefit database. *Can J Clin Pharmacol.* 2003;10(2):67-71.
